# Supplementary material
Source: PubMed Central journal article supplement (PMC8968748)
Supplement: NIHMS1769820-supplement-Support_Info.pdf [file NIHMS1769820-supplement-Support_Info.pdf]

## SUPPORTING INFORMATION

### Discovery and optimization of 2*H*-1 $\lambda^2$ -pyridin-2-one inhibitors of mutant isocitrate dehydrogenase 1 for the treatment of cancer

Jason M. Rohde<sup>a,g</sup>, Surendra Karavadhi<sup>a</sup>, Rajan Pragani<sup>a</sup>, Li Liu<sup>a</sup>, Yuhong Fang<sup>a</sup>, Weihe Zhang<sup>b</sup>, Andrew McIver<sup>b</sup>, Hongchao Zheng<sup>b</sup>, Qingyang Liu<sup>b</sup>, Mindy I. Davis<sup>a</sup>, Daniel J. Urban<sup>a</sup>, Tobie D. Lee<sup>a</sup>, Dorian M. Cheff<sup>a</sup>, Melinda Hollingshead<sup>c</sup>, Mark J. Henderson<sup>a</sup>, Natalia J. Martinez<sup>a</sup>, Kyle R. Brimacombe<sup>a</sup>, Adam Yasgar<sup>a</sup>, Wei Zhao<sup>a</sup>, Carleen Klumpp-Thomas<sup>a</sup>, Sam Michael<sup>a</sup>, Joseph Covey<sup>d</sup>, William J. Moore<sup>c</sup>, Gordon M. Stott<sup>c</sup>, Zhuyin Li<sup>a</sup>, Anton Simeonov<sup>a</sup>, Ajit Jadhav<sup>a</sup>, Stephen Frye<sup>b</sup>, Matthew D. Hall<sup>a\*</sup>, Min Shen<sup>a\*</sup>, Xiaodong Wang<sup>b\*</sup>, Samarjit Patnaik<sup>a\*</sup>, Matthew B. Boxer<sup>a,f</sup>

<sup>a</sup>National Center for Advancing Translational Sciences, National Institutes of Health, 9800 Medical Center Drive, Rockville, MD, 20850, USA

<sup>b</sup>Center for Integrative Chemical Biology and Drug Discovery, Division for Chemical Biology and Medicinal Chemistry, Eshelman School of Pharmacy, University of North Carolina at Chapel Hill, Chapel Hill, NC 27514

<sup>c</sup>Biological Testing Branch, Developmental therapeutics Program, National Cancer Institute, Frederick, MD 21702

<sup>d</sup>Developmental Therapeutics Program Division of Cancer Treatment and Diagnosis, National Cancer Institute, Rockville, MD 20850

<sup>e</sup>NExT Program Support, Applied/Developmental Research Directorate, Leidos Biomedical Research, Inc., Frederick National Laboratory for Cancer Research, Frederick, Maryland, 21702

<sup>f</sup>Current address: Veralox Therapeutics Inc., 4539 Metropolitan Ct., Frederick, MD 21704

<sup>g</sup>Current address: Walter Reed Army Institute of Research, 503 Robert Grant Avenue, Silver Spring, MD 20910

\*To whom correspondence should be addressed

Matthew D. Hall, Min Shen, Samarjit Patnaik: 9800 Medical Center Dr., Rockville, MD 20850, Email: [matthew.hall@nih.gov](mailto:matthew.hall@nih.gov), [shenmin@mail.nih.gov](mailto:shenmin@mail.nih.gov), [samarjit.patnaik@nih.gov](mailto:samarjit.patnaik@nih.gov)

Xiaodong Wang: 3204 Marsico Hall, 125 Mason Farm Rd, Chapel Hill, NC 27599-7363, Email: [xiaodonw@unc.edu](mailto:xiaodonw@unc.edu)

#### Keywords:

mIDH1 ,inhibitor, 2-hydroxyglutarate

| Table of Contents                                       | page |
|---------------------------------------------------------|------|
| S1. QC and <sup>1</sup> H NMR of representative analogs | S2   |
| S2. Profiling data for (+)-119                          | S18  |
| S3. Crystal Structure Report for VIIb (Scheme 3)        | S19  |

## S1. QC and <sup>1</sup>H NMR of representative analogs

2-(3-(4-(4-Chlorophenyl)thiazol-2-yl)-7,7-dimethyl-2,5-dioxo-5,6,7,8-tetrahydroquinolin-1(2H)-yl)-3-methoxybenzoic acid (**59**):

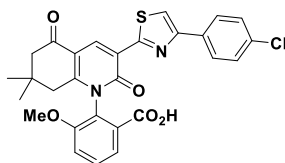

59

Chemical Formula: C<sub>28</sub>H<sub>23</sub>ClN<sub>2</sub>O<sub>5</sub>S  
Exact Mass: 534.10

Method Info : Standard Gradient 4% to 100% Acetonitrile (0.05% TFA) over 7 mi  
Luna C18 3 micron 3 x 75mm

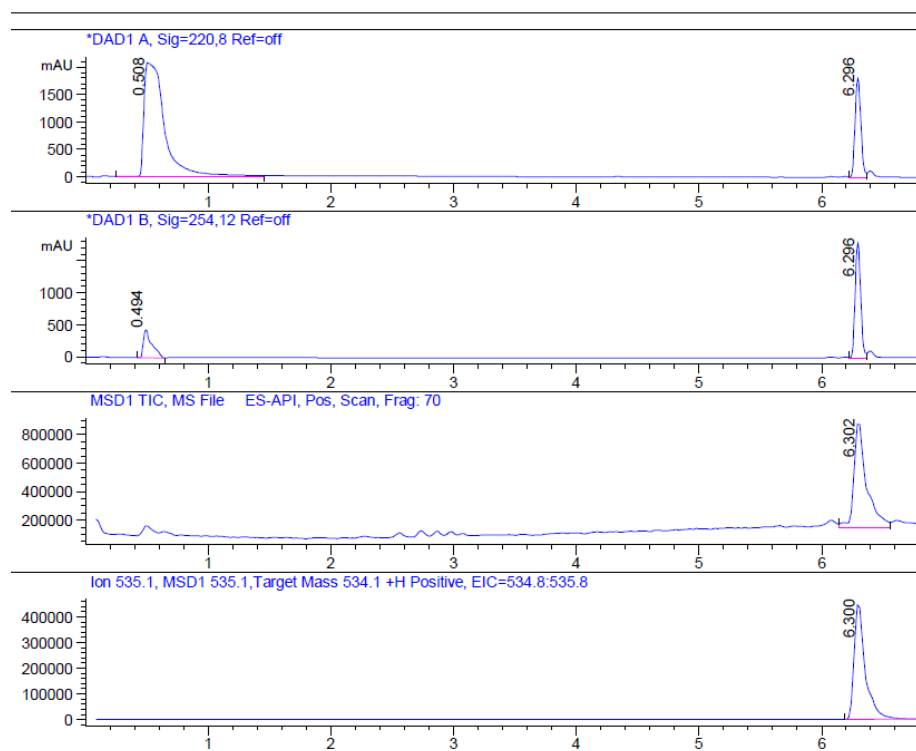

Integration Results for DAD1 A, Sig=220.8 Ref=off

| RetTim | Width | Area     | Height  | Area% | MS (+) |
|--------|-------|----------|---------|-------|--------|
| 0.51   | 0.15  | 24789.49 | 2081.57 | 80.80 | 317    |
| 6.30   | 0.05  | 5890.87  | 1803.96 | 19.20 | 535    |

Integration Results for DAD1 B, Sig=254.12 Ref=off

| RetTim | Width | Area    | Height  | Area% | MS (+) |
|--------|-------|---------|---------|-------|--------|
| 0.49   | 0.07  | 2118.98 | 441.56  | 27.35 | 317    |
| 6.30   | 0.05  | 5628.41 | 1798.31 | 72.65 | 535    |

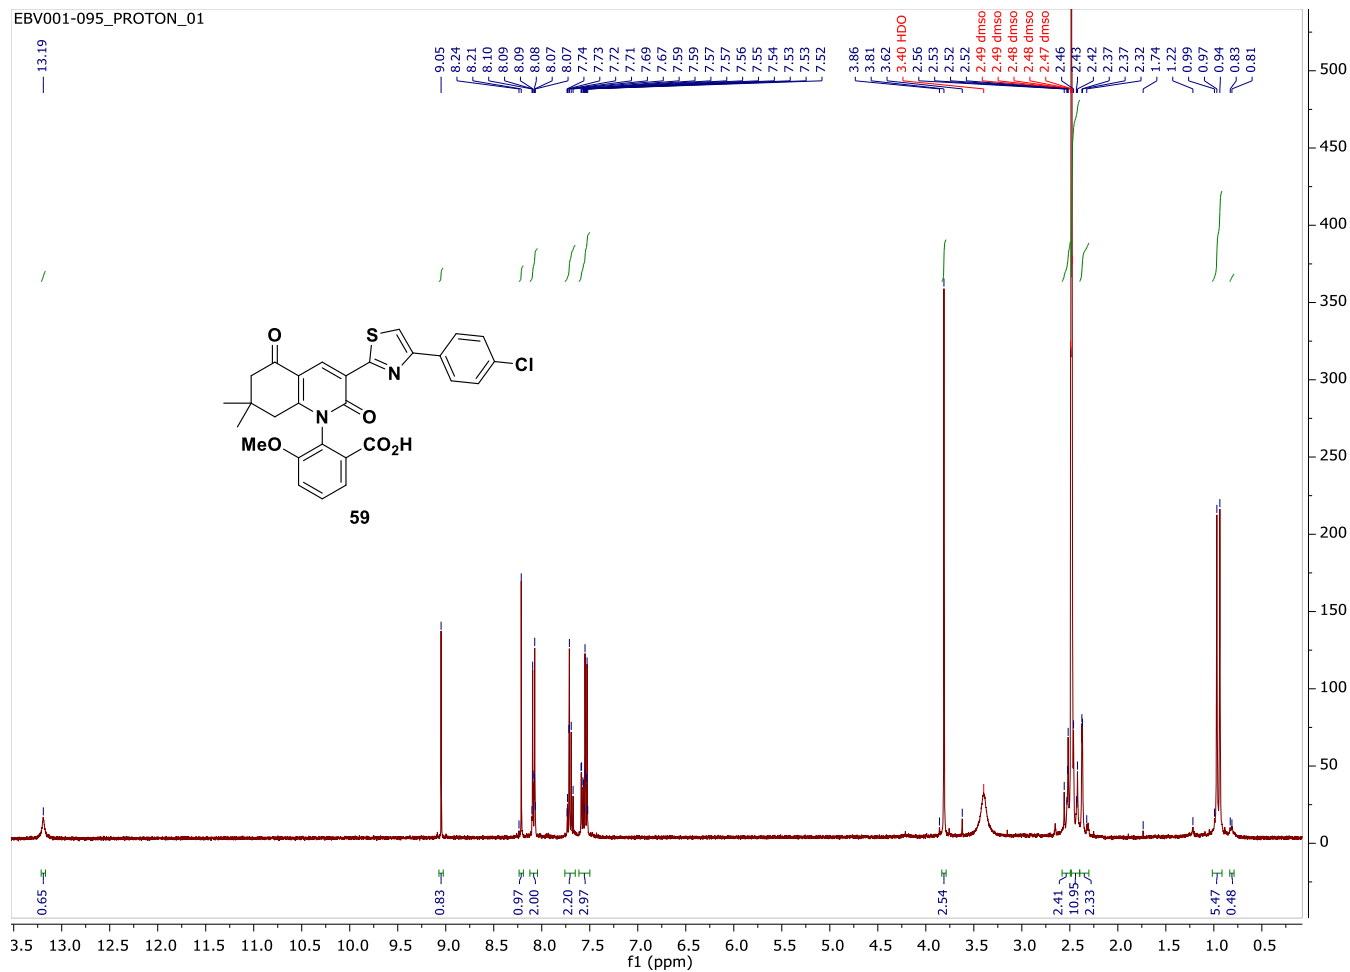

3-(4-(4-Chlorophenyl)thiazol-2-yl)-1-(2,6-diethylphenyl)-7,7-dimethyl-7,8-dihydroquinoline-2,5(1H,6H)-dione (**66**):

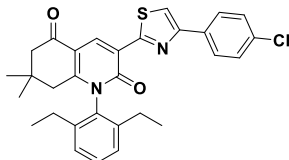

**66**  
 Chemical Formula: C<sub>30</sub>H<sub>29</sub>ClN<sub>2</sub>O<sub>2</sub>S  
 Exact Mass: 516.16

Method Info : Standard Gradient 4% to 100% Acetonitrile (0.05% TFA) over 7 minutes  
 Luna C18 3 micron 3 x 75mm

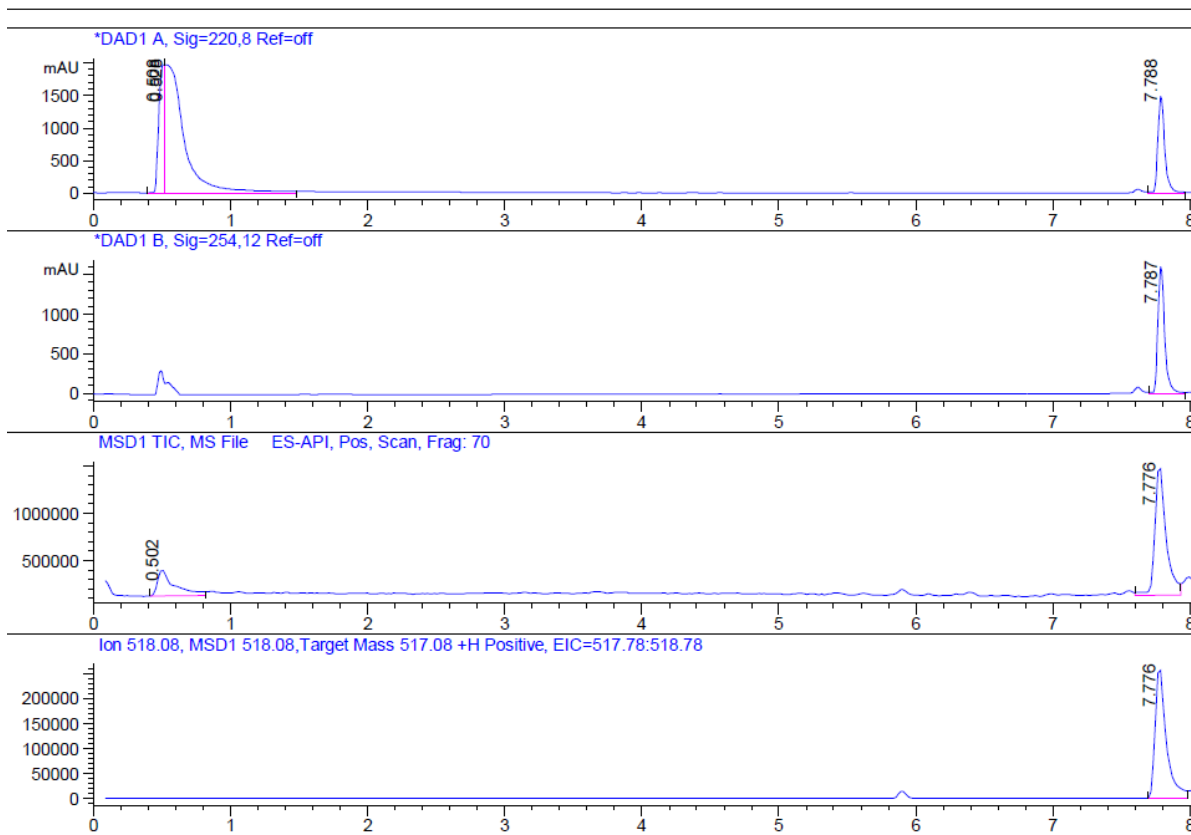

Integration Results for DAD1 A, Sig=220,8 Ref=off

| RetTim | Width | Area     | Height  | Area% | MS (+) |
|--------|-------|----------|---------|-------|--------|
| 0.51   | 0.04  | 5289.90  | 1971.53 | 17.47 | 179    |
| 0.53   | 0.17  | 19805.24 | 1970.02 | 65.41 | 179    |
| 7.79   | 0.05  | 5182.13  | 1489.39 | 17.12 | 517    |

jmr006-005fi\_PROTON\_01

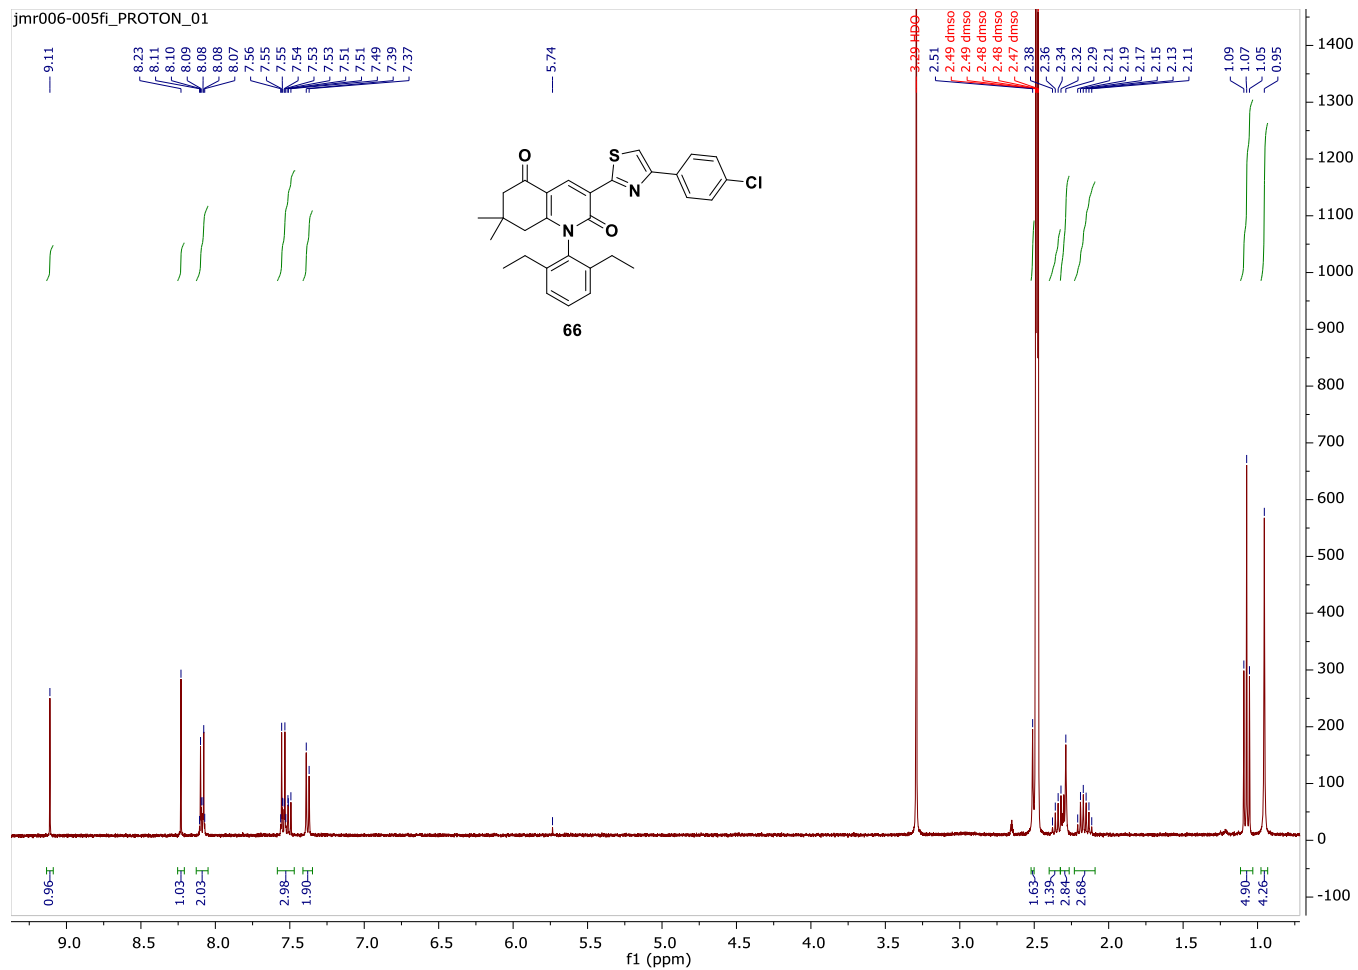

3-(4-(4-Chlorophenyl)thiazol-2-yl)-1-(2,6-diethylphenyl)-6-isobutyl-5-(piperazine-1-carbonyl)pyridin-2(1H)-one (**91**):

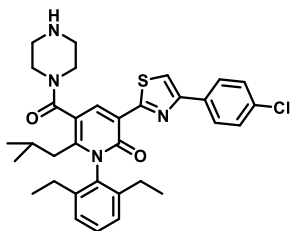

Chemical Formula: C<sub>33</sub>H<sub>37</sub>ClN<sub>4</sub>O<sub>2</sub>S  
Exact Mass: 588.23

Method Info : Standard Gradient 4% to 100% Acetonitrile (0.05% TFA) over 7 minutes  
Luna C18 3 micron 3 x 75mm

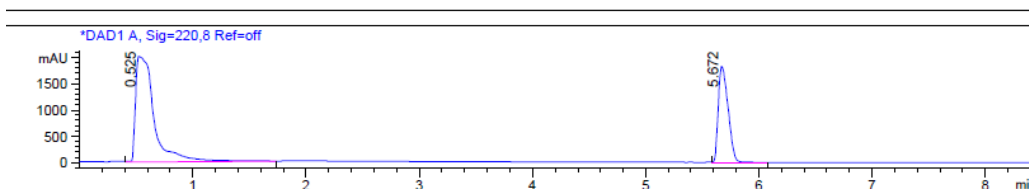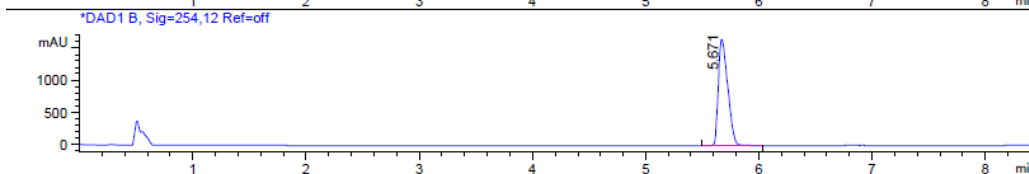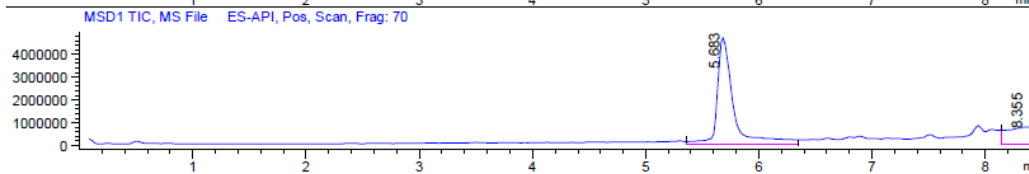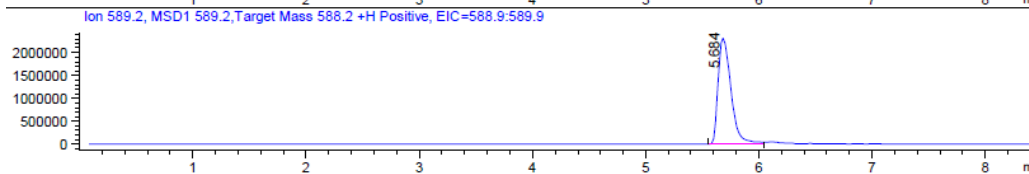

Integration Results for DAD1 A, Sig=220,8 Ref=off

| RetTim | Width | Area     | Height  | Area% | MS (+) |
|--------|-------|----------|---------|-------|--------|
| 0.53   | 0.15  | 22919.35 | 2019.42 | 67.53 | 179    |
| 5.67   | 0.10  | 11018.99 | 1832.58 | 32.47 | 589    |

Integration Results for DAD1 B, Sig=254,12 Ref=off

| RetTim | Width | Area    | Height  | Area%  | MS (+) |
|--------|-------|---------|---------|--------|--------|
| 5.67   | 0.09  | 9588.02 | 1658.08 | 100.00 | 589    |

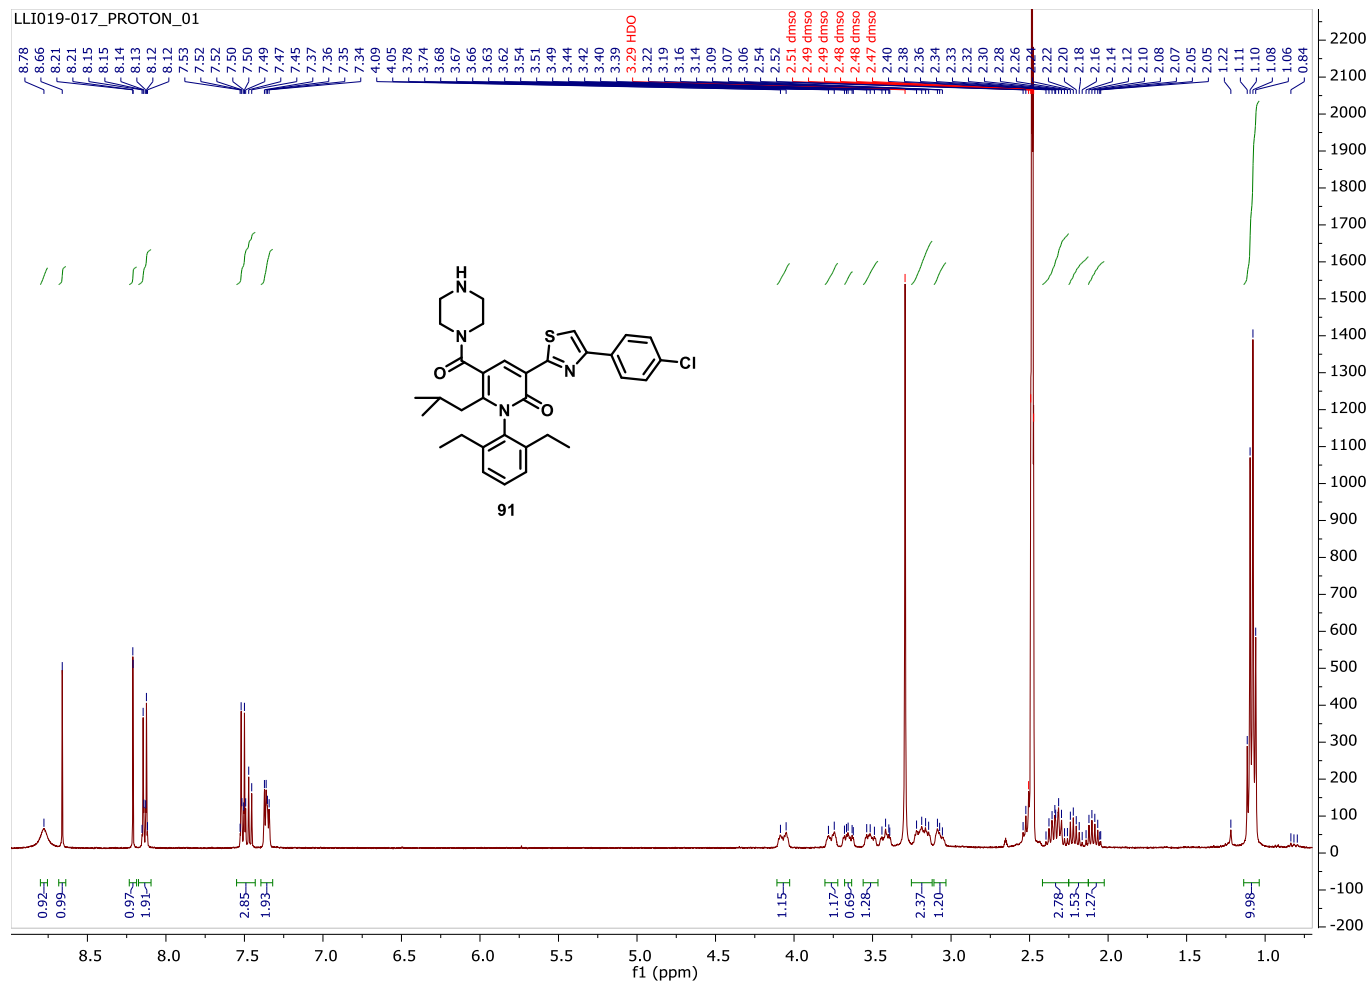

3-(4-(4-Chlorophenyl)thiazol-2-yl)-1-(2,6-diethylphenyl)-5-(3-methylpiperazine-1-carbonyl)-6-(2-methylprop-1-en-1-yl)pyridin-2(1H)-one (**99**)

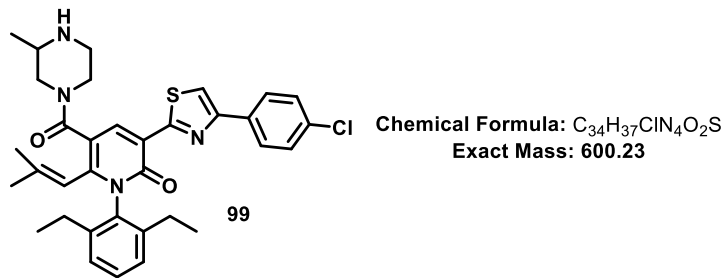

Method Info : Standard Gradient 4% to 100% Acetonitrile (0.05% TFA) over 7 minutes  
Luna C18 3 micron 3 x 75mm

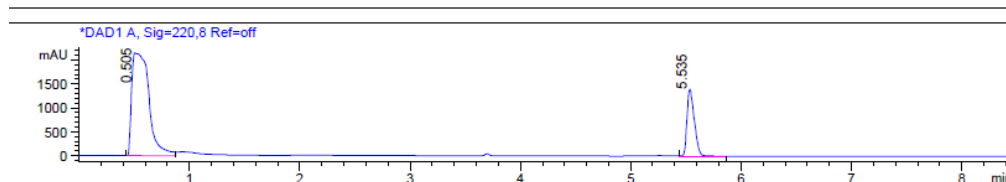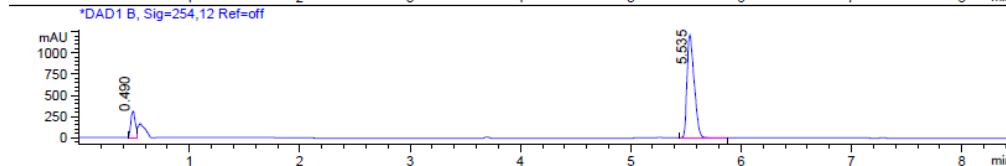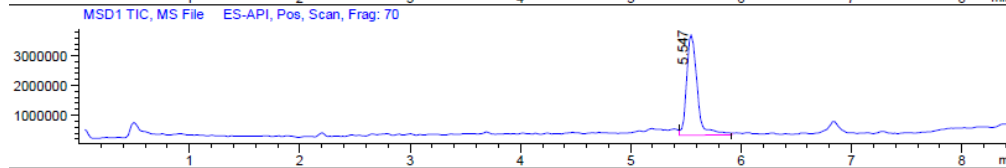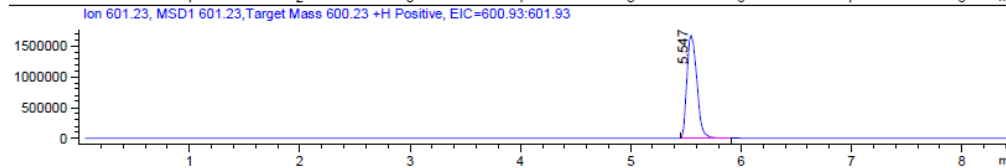

Integration Results for DAD1 A, Sig=220,8 Ref=off

| RetTim | Width | Area     | Height  | Area% | MS (+) |
|--------|-------|----------|---------|-------|--------|
| 0.50   | 0.14  | 23445.16 | 2156.96 | 78.38 | 179    |
| 5.53   | 0.07  | 6466.48  | 1400.39 | 21.62 | 601    |

Integration Results for DAD1 B, Sig=254,12 Ref=off

| RetTim | Width | Area    | Height  | Area% | MS (+) |
|--------|-------|---------|---------|-------|--------|
| 0.49   | 0.04  | 861.07  | 313.55  | 13.21 | 179    |
| 5.53   | 0.07  | 5656.51 | 1223.25 | 86.79 | 601    |



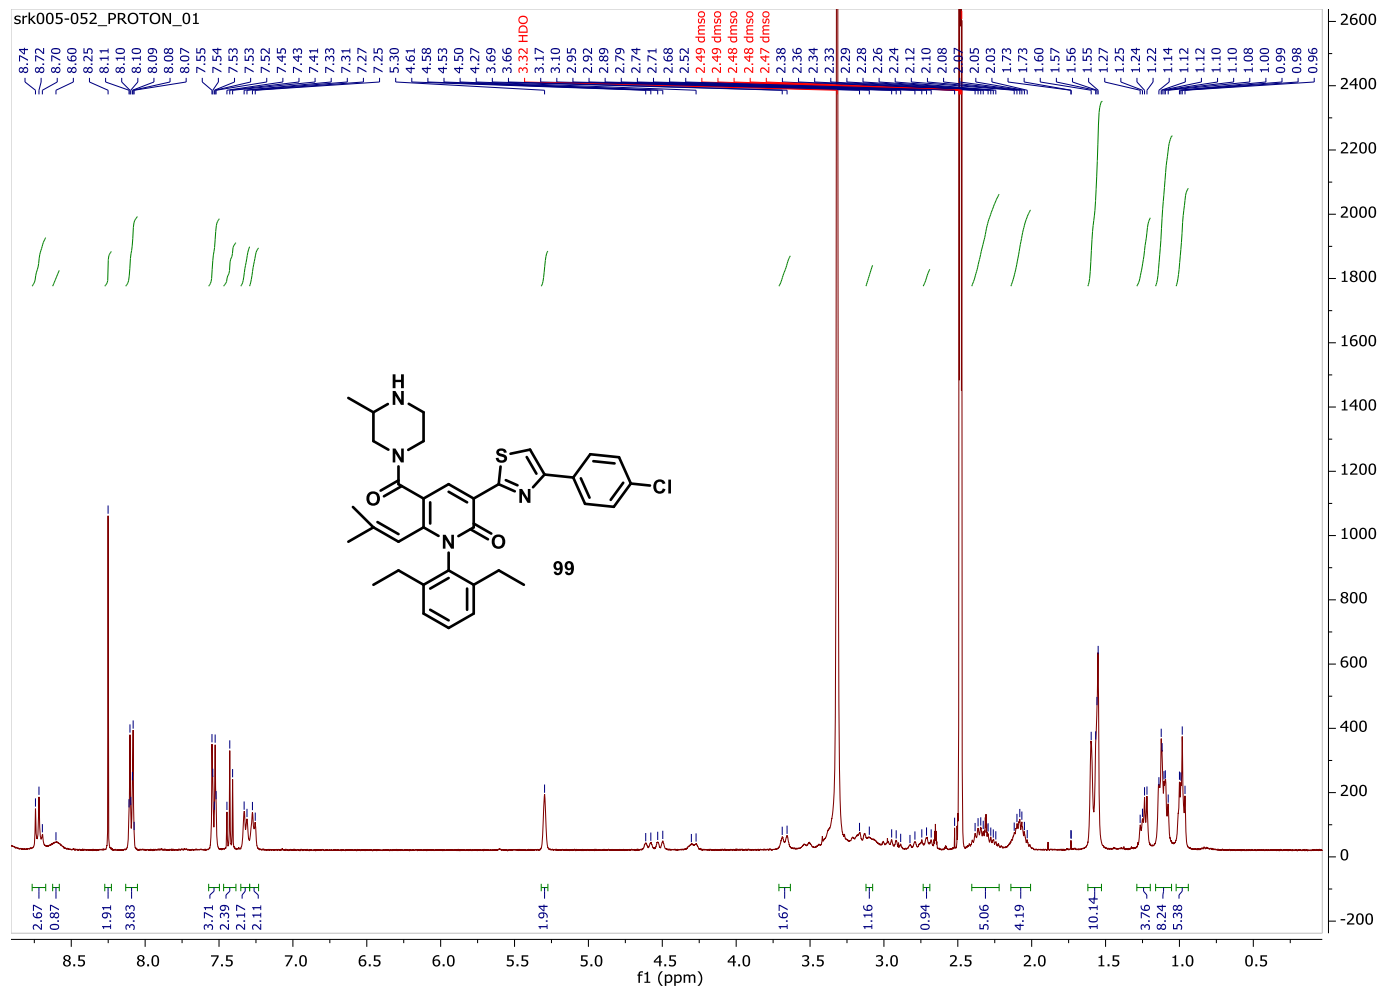

3-(4-(4-Chlorophenyl)thiazol-2-yl)-1-(2,6-diethylphenyl)-5-(2-methylpiperazine-1-carbonyl)-6-(2-methylprop-1-en-1-yl)pyridin-2(1H)-one (**100**):

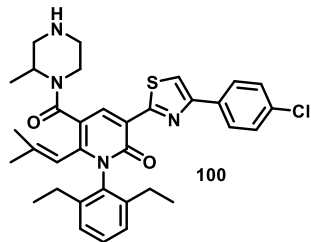

Chemical Formula: C<sub>34</sub>H<sub>37</sub>ClN<sub>4</sub>O<sub>2</sub>S  
Exact Mass: 600.23

Method Info : Standard Gradient 4% to 100% Acetonitrile (0.05% TFA) over 7 minutes  
Luna C18 3 micron 3 x 75mm

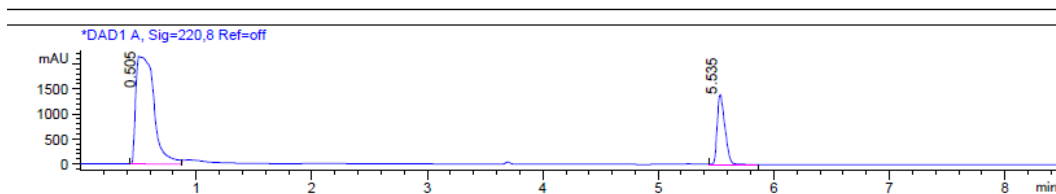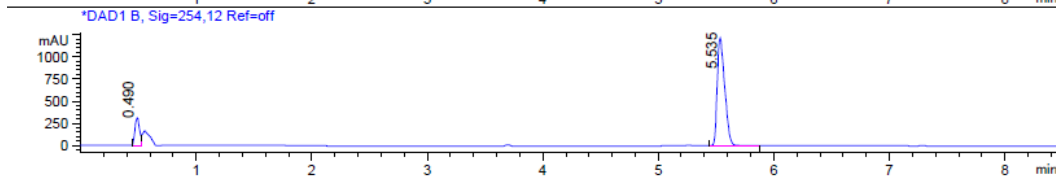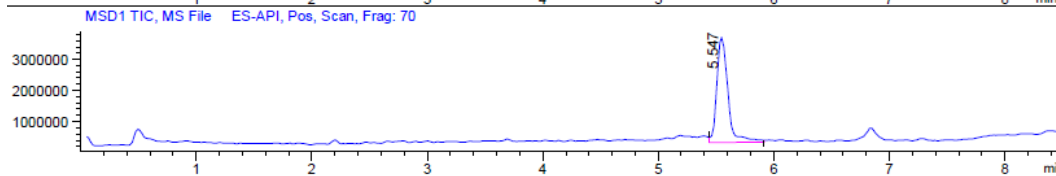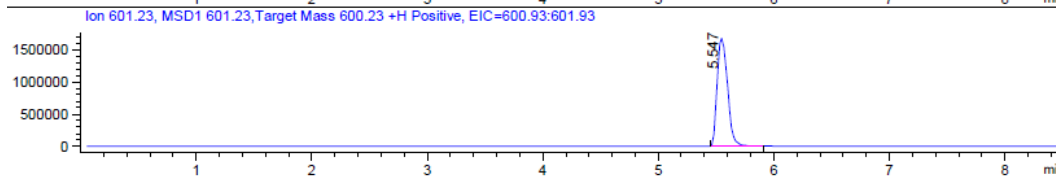

Integration Results for DAD1 A, Sig=220,8 Ref=off

| RetTim | Width | Area     | Height  | Area% | MS (+) |
|--------|-------|----------|---------|-------|--------|
| 0.50   | 0.14  | 23445.16 | 2156.96 | 78.38 | 179    |
| 5.53   | 0.07  | 6466.48  | 1400.39 | 21.62 | 601    |

Integration Results for DAD1 B, Sig=254,12 Ref=off

| RetTim | Width | Area    | Height  | Area% | MS (+) |
|--------|-------|---------|---------|-------|--------|
| 0.49   | 0.04  | 861.07  | 313.55  | 13.21 | 179    |
| 5.53   | 0.07  | 5656.51 | 1223.25 | 86.79 | 601    |

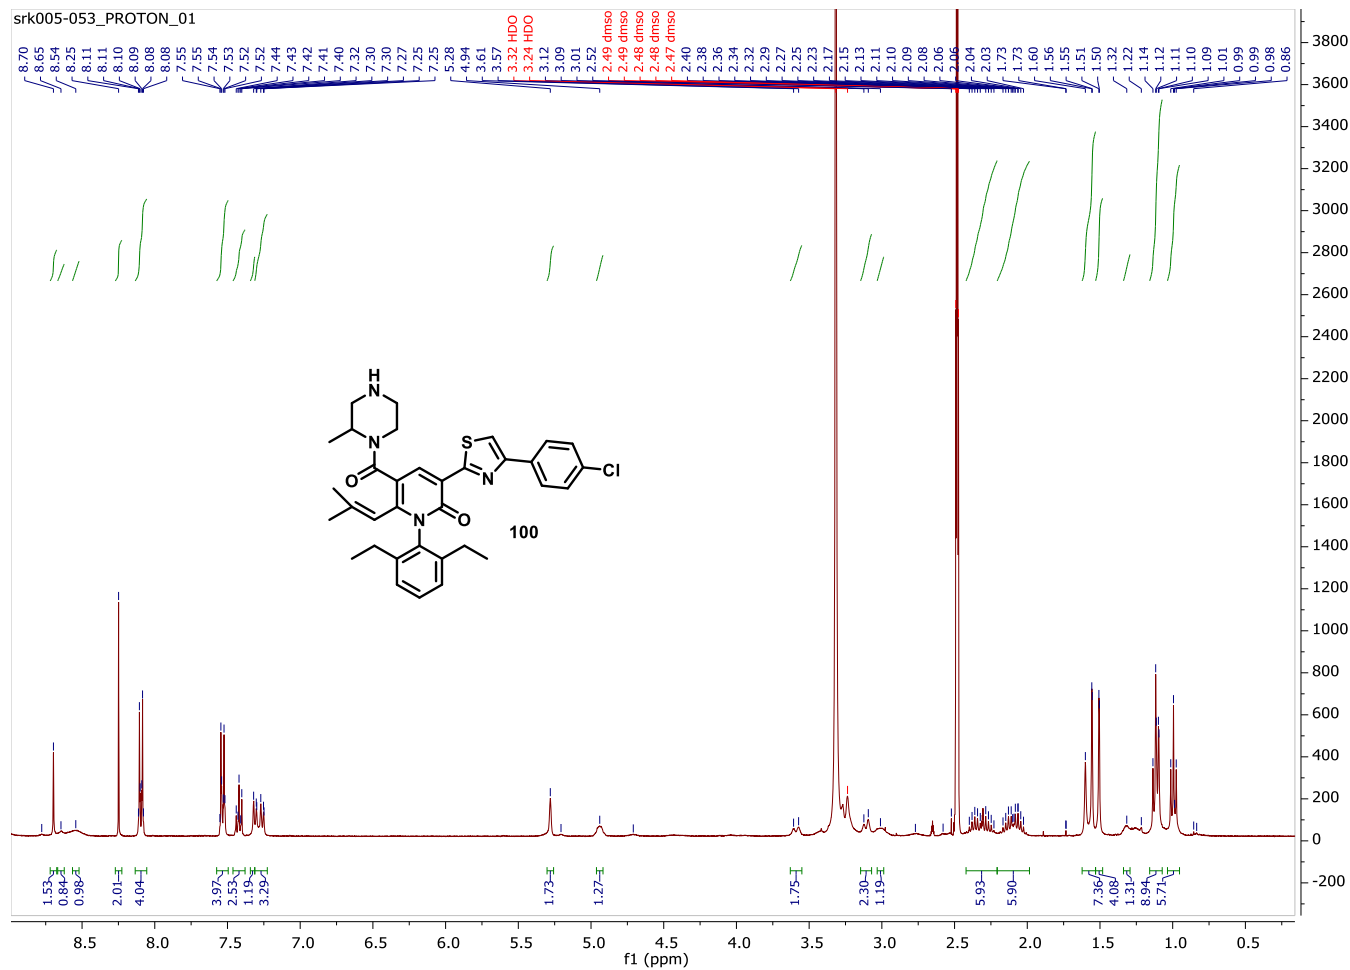

5-((1R,5S)-3,8-Diazabicyclo[3.2.1]octane-3-carbonyl)-3-(4-(4-chlorophenyl)thiazol-2-yl)-1-(2,6-diethylphenyl)-6-(2-methylprop-1-en-1-yl)pyridin-2(1H)-one (**111**):

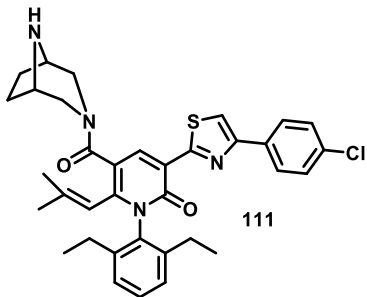

Chemical Formula: C<sub>35</sub>H<sub>37</sub>ClN<sub>4</sub>O<sub>2</sub>S  
Exact Mass: 612.23

Method Info : Standard Gradient 4% to 100% Acetonitrile (0.05% TFA) over 7 minutes  
Luna C18 3 micron 3 x 75mm

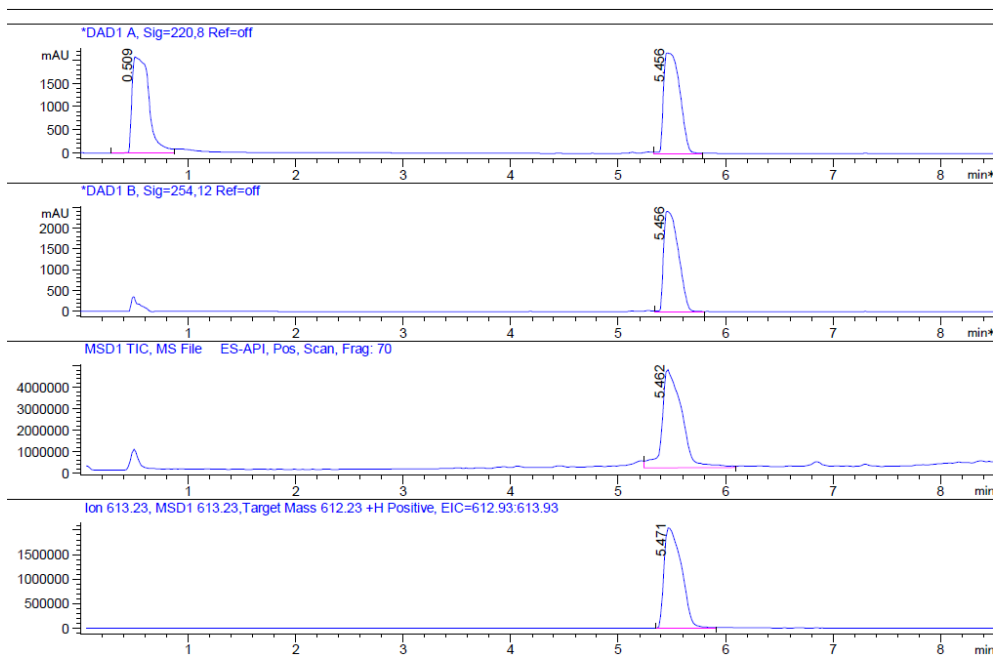

Integration Results for DAD1 A, Sig=220,8 Ref=off

| RetTim | Width | Area     | Height  | Area% | MS(+) |
|--------|-------|----------|---------|-------|-------|
| 0.51   | 0.14  | 22721.78 | 2080.79 | 50.12 | 179   |
| 5.46   | 0.14  | 22613.84 | 2174.38 | 49.88 | 613   |

Integration Results for DAD1 B, Sig=254,12 Ref=off

| RetTim | Width | Area     | Height  | Area%  | MS(+) |
|--------|-------|----------|---------|--------|-------|
| 5.46   | 0.12  | 22897.88 | 2419.07 | 100.00 | 613   |



5-(3,8-Diazabicyclo[3.2.1]octane-8-carbonyl)-3-(4-(4-chlorophenyl)thiazol-2-yl)-1-(2,6-diethylphenyl)-6-(2-methylprop-1-en-1-yl)pyridin-2(1H)-one (**112**):

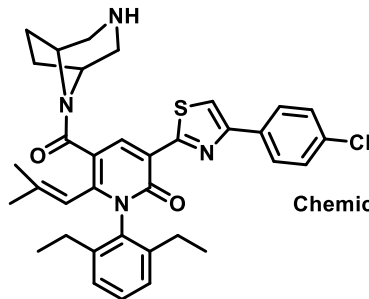

Chemical Formula: C<sub>35</sub>H<sub>37</sub>ClN<sub>4</sub>O<sub>2</sub>S  
Exact Mass: 612.23

Method Info : Long Gradient 4% to 100% ACN over 7 minutes (0.05%TFA)  
Luna C18 3.0 x 75 mm

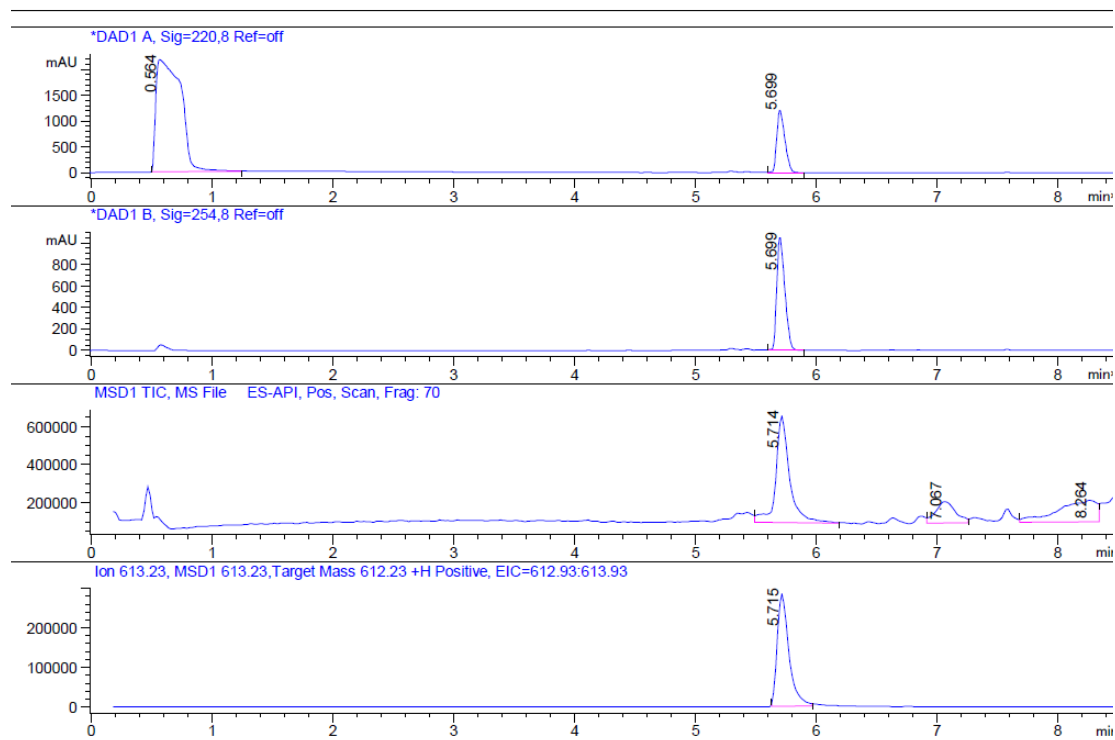

Integration Results for DAD1 A, Sig=220,8 Ref=off

| RetTim | Width | Area     | Height  | Area% | MS (+) |
|--------|-------|----------|---------|-------|--------|
| 0.56   | 0.19  | 30958.56 | 2171.89 | 84.66 | 179    |
| 5.70   | 0.07  | 5607.86  | 1208.39 | 15.34 | 613    |

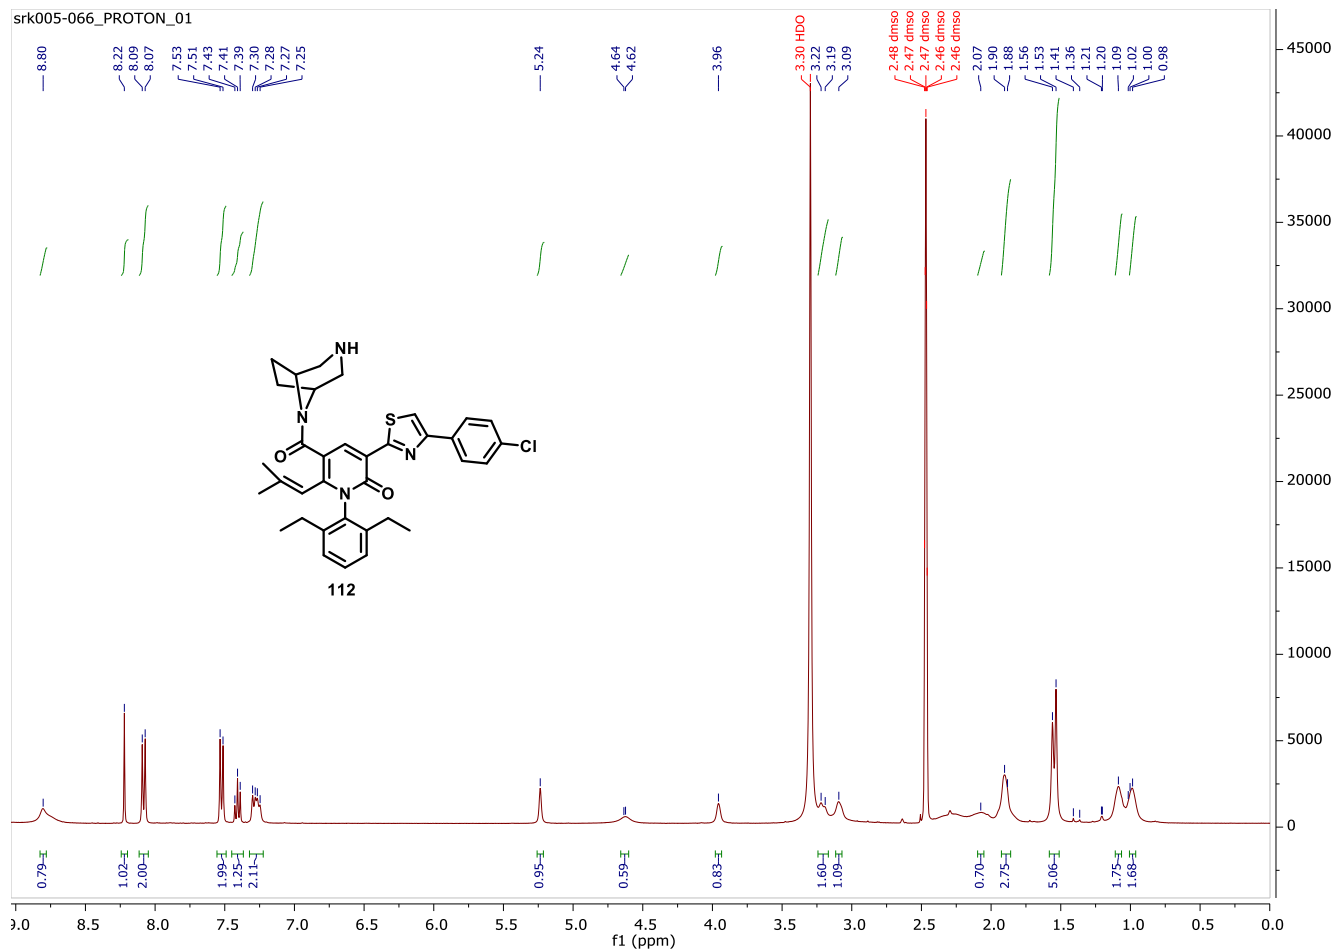

1-(5-Chloro-2-ethylphenyl)-3-(4-(4-chlorophenyl)thiazol-2-yl)-6-(2-methylprop-1-en-1-yl)-5-(piperazine-1-carbonyl)pyridin-2(1H)-one (**119**):

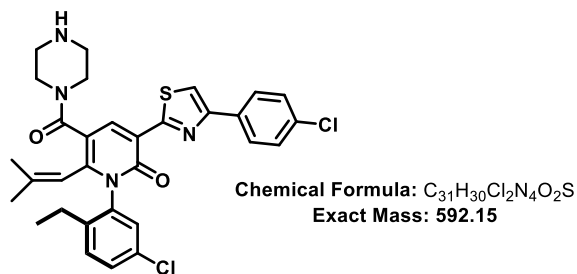

Method Info : Long Gradient 4% to 100% Acetonitrile (0.05% TFA) over 7 minutes  
Agilent Eclipse XDB-C18 3 micron 3 x 75mm

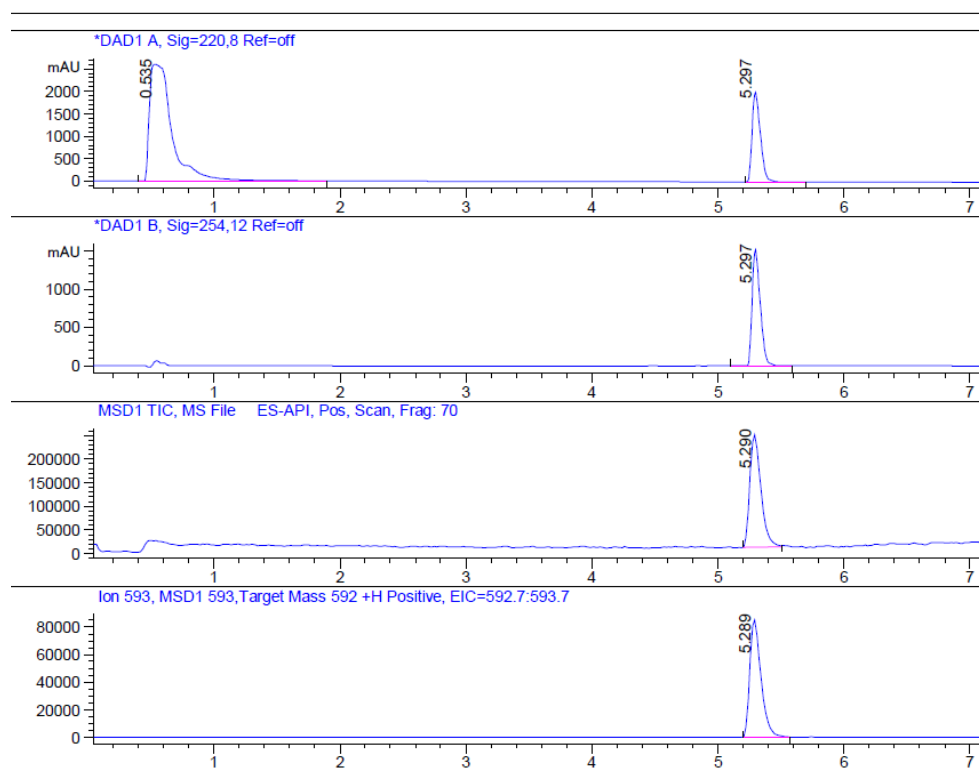

Integration Results for DAD1 A, Sig=220,8 Ref=off

| RetTim | Width | Area     | Height  | Area% | MS (+) |
|--------|-------|----------|---------|-------|--------|
| 0.54   | 0.17  | 32192.69 | 2597.78 | 78.15 | 179    |
| 5.30   | 0.07  | 9002.09  | 1996.44 | 21.85 | 593    |



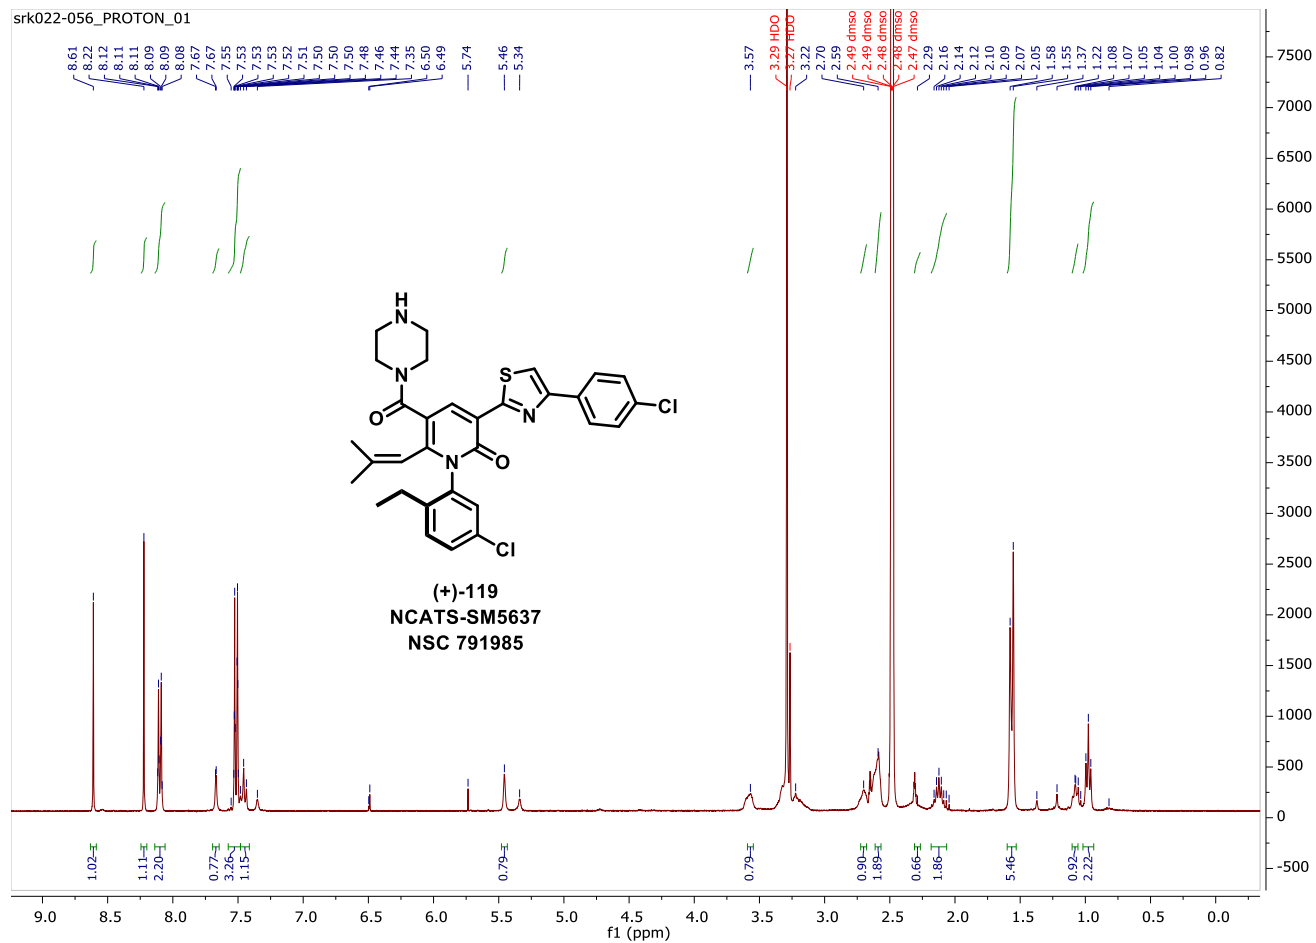

S2. Profiling data for (+)-119

|                                                     |                      |                                     |       |
|-----------------------------------------------------|----------------------|-------------------------------------|-------|
| <b>Biochemical IC<sub>50</sub></b>                  | IDH1-R132C           | 94 nM                               |       |
|                                                     | IDH1-R132H           | 39 nM                               |       |
| <b>Cellular 2-HG inhibition</b>                     | U87 (R132H)          | 0.4 nM                              |       |
| <b>Liver micro. stability (t<sub>1/2</sub>/min)</b> | human                | 200                                 |       |
|                                                     | rat                  | 125                                 |       |
|                                                     | dog                  | 273                                 |       |
|                                                     | mouse                | 78                                  |       |
| <b>Hepat. stability (t<sub>1/2</sub>/min)</b>       | human                | 733                                 |       |
|                                                     | rat                  | 160                                 |       |
|                                                     | dog                  | 326                                 |       |
|                                                     | mouse                | 152                                 |       |
| <b>Solubility (μM)</b>                              | SGF (pH 1.2)         | 84                                  |       |
|                                                     | FaSSGF (pH 1.6)      | 86                                  |       |
|                                                     | FeSSIF (pH 5.0)      | 480                                 |       |
|                                                     | FaSSIF (pH 6.5)      | 425                                 |       |
|                                                     | SIF (pH 6.8)         | 17                                  |       |
|                                                     | PBS (pH 7.4)         | 11                                  |       |
| <b>LogD</b>                                         | pH 1.6               | 3.04                                |       |
|                                                     | pH 5                 | 3.28                                |       |
|                                                     | pH 7.4               | 3.48                                |       |
|                                                     | pH 9                 | 3.24                                |       |
| <b>PPB</b>                                          | human                | >99%                                |       |
|                                                     | rat                  | >99%                                |       |
|                                                     | mouse                | >99%                                |       |
| <b>mouse PK</b>                                     | <b>PO (3 mg/kg)</b>  | plasma AUC (h*ng/mL)                | 1415  |
|                                                     |                      | plasma C <sub>max</sub> (ng/mL)     | 119   |
|                                                     |                      | plasma %F                           | 64    |
|                                                     | <b>IV (3 mg/kg)</b>  | plasma Cl (mL/min/kg)               | 23    |
|                                                     | <b>PO (30 mg/kg)</b> | plasma AUC (h*ng/mL)                | 24645 |
|                                                     |                      | plasma C <sub>max</sub> (ng/mL)     | 2013  |
|                                                     |                      | brain AUC (h*ng/g)                  | 7138  |
|                                                     |                      | brain C <sub>max</sub> (ng/g)       | 595   |
|                                                     |                      | plasma/brain AUC ratio              | 3.5   |
|                                                     |                      | plasma/brain C <sub>max</sub> ratio | 3.7   |

Note: There might be slight difference in the values here and the main text as these values are from different experiments and within the variability of the assays.

### S3. Crystal Structure Report for VIIIb (Scheme 3)

This was formed from (+)-**119** during crystallization. VIIIb is referred as **NIH33** here.

Dr. Curtis Moore, UCSD Crystallography Lab, 5128 Urey Hall, 9500 Gilman Dr, La Jolla, CA 92093-0358, current email: moore.4060@osu.edu

#### Experimental Summary

The single crystal X-ray diffraction studies were carried out on a Bruker Kappa APEX-II CCD diffractometer equipped with Cu K $\alpha$  radiation ( $\lambda = 1.5478$ ). Crystals of the subject compound were grown from the following. Approximately 3mg of sample was dissolved in 1000 $\mu$ L of a dilute Ethanol/HCl solution and then filtered through silica. The solution was then vapor diffused with MTBE for 7 days and then the resultant solution was allowed to slowly evaporate for 3 days. A 0.054 x 0.031 x 0.007 mm piece of a yellow plate was mounted on a Cryoloop with Paratone oil. Data were collected in a nitrogen gas stream at 100(2) K using  $\phi$  and  $\omega$  scans. Crystal-to-detector distance was 40 mm using variable exposure time (10s-30s) depending on  $\theta$  with a scan width of 1.0 $^\circ$ . Data collection was 98.7% complete to 68.00 $^\circ$  in  $\theta$ . A total of 22479 reflections were collected covering the indices,  $-15 \leq h \leq 15$ ,  $-11 \leq k \leq 11$ ,  $-13 \leq l \leq 13$ . 5469 reflections were found to be symmetry independent, with a  $R_{\text{int}}$  of 0.0608. Indexing and unit cell refinement indicated a primitive, monoclinic lattice. The space group was found to be  $P2_1$ . The data were integrated using the Bruker SAINT software program and scaled using the SADABS software program. Solution by direct methods (SHELXT) produced a complete phasing model consistent with the proposed structure.

All nonhydrogen atoms were refined anisotropically by full-matrix least-squares (SHELXL-2014). All hydrogen atoms were placed using a riding model. Their positions were constrained relative to their parent atom using the appropriate HFIX command in SHELXL-2014. The absolute stereochemistry of the molecule was established by anomalous dispersion using the Parson's method with a Flack parameter of 0.000(12). Crystallographic data are summarized in Table 1.

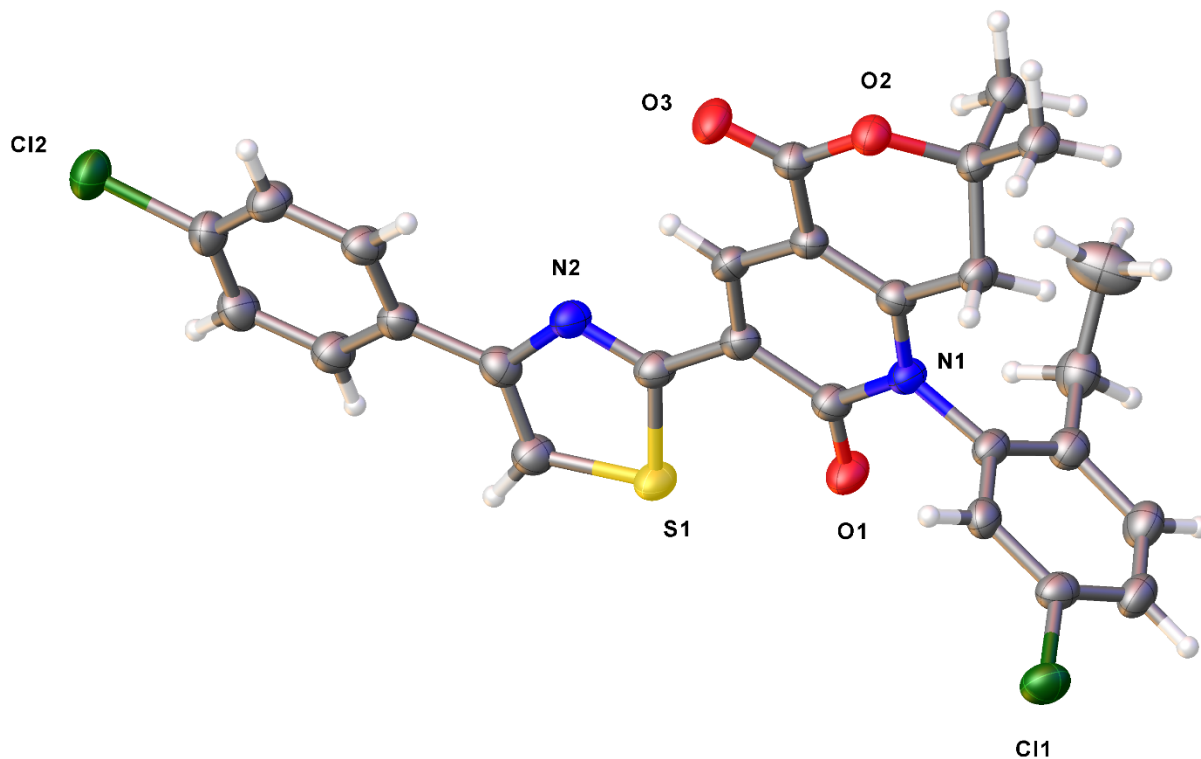

**Table S1.** Crystal data and structure refinement for NIH33.

|                                   |                                             |                             |
|-----------------------------------|---------------------------------------------|-----------------------------|
| Report date                       | 2017-07-21                                  |                             |
| Identification code               | Compound 2                                  |                             |
| Empirical formula                 | C32 H34 Cl2 N2 O4 S                         |                             |
| Molecular formula                 | C27 H22 Cl2 N2 O3 S, C5 H12 O               |                             |
| Formula weight                    | 613.57                                      |                             |
| Temperature                       | 100.0 K                                     |                             |
| Wavelength                        | 1.54178 Å                                   |                             |
| Crystal system                    | Monoclinic                                  |                             |
| Space group                       | P 1 21 1                                    |                             |
| Unit cell dimensions              | a = 12.5473(4) Å                            | $\alpha = 90^\circ$ .       |
|                                   | b = 9.3011(3) Å                             | $\beta = 95.207(2)^\circ$ . |
|                                   | c = 13.0174(4) Å                            | $\gamma = 90^\circ$ .       |
| Volume                            | 1512.91(8) Å <sup>3</sup>                   |                             |
| Z                                 | 2                                           |                             |
| Density (calculated)              | 1.347 Mg/m <sup>3</sup>                     |                             |
| Absorption coefficient            | 2.897 mm <sup>-1</sup>                      |                             |
| F(000)                            | 644                                         |                             |
| Crystal size                      | 0.054 x 0.031 x 0.007 mm <sup>3</sup>       |                             |
| Crystal color, habit              | Yellow Plate                                |                             |
| Theta range for data collection   | 3.409 to 68.509°.                           |                             |
| Index ranges                      | -15<=h<=15, -11<=k<=11, -13<=l<=15          |                             |
| Reflections collected             | 22479                                       |                             |
| Independent reflections           | 5469 [R(int) = 0.0608, R(sigma) = 0.0515]   |                             |
| Completeness to theta = 68.000°   | 98.7 %                                      |                             |
| Absorption correction             | Semi-empirical from equivalents             |                             |
| Max. and min. transmission        | 0.3201 and 0.2197                           |                             |
| Refinement method                 | Full-matrix least-squares on F <sup>2</sup> |                             |
| Data / restraints / parameters    | 5469 / 1 / 377                              |                             |
| Goodness-of-fit on F <sup>2</sup> | 1.018                                       |                             |
| Final R indices [I>2sigma(I)]     | R1 = 0.0496, wR2 = 0.1137                   |                             |
| R indices (all data)              | R1 = 0.0609, wR2 = 0.1196                   |                             |
| Absolute structure parameter      | 0.000(12)                                   |                             |
| Extinction coefficient            | n/a                                         |                             |
| Largest diff. peak and hole       | 0.463 and -0.247 e.Å <sup>-3</sup>          |                             |

**Table S2.** Atomic coordinates ( $\times 10^4$ ) and equivalent isotropic displacement parameters ( $\text{\AA}^2 \times 10^3$ ) for NIH33.  $U(\text{eq})$  is defined as one third of the trace of the orthogonalized  $U^{ij}$  tensor.

|       | x       | y       | z        | $U(\text{eq})$ |
|-------|---------|---------|----------|----------------|
| Cl(1) | 6600(1) | 2403(1) | 9182(1)  | 43(1)          |
| Cl(2) | 2341(1) | 2690(2) | -2311(1) | 47(1)          |
| S(1)  | 6176(1) | 906(1)  | 3256(1)  | 36(1)          |
| O(1)  | 7325(3) | 2066(4) | 4935(3)  | 39(1)          |
| O(2)  | 6099(3) | 8553(3) | 5352(3)  | 32(1)          |
| O(3)  | 5081(3) | 7962(4) | 3957(3)  | 41(1)          |
| N(1)  | 7199(3) | 4316(4) | 5608(3)  | 29(1)          |
| N(2)  | 5354(3) | 3093(4) | 2280(3)  | 32(1)          |
| C(1)  | 6968(4) | 3280(5) | 4817(4)  | 31(1)          |
| C(2)  | 6306(4) | 3776(5) | 3921(4)  | 31(1)          |
| C(3)  | 5949(4) | 5165(5) | 3865(4)  | 30(1)          |
| C(4)  | 6223(4) | 6139(5) | 4674(4)  | 30(1)          |
| C(5)  | 6837(4) | 5705(5) | 5538(4)  | 29(1)          |
| C(6)  | 7104(4) | 6741(5) | 6403(4)  | 31(1)          |
| C(7)  | 7103(4) | 8282(5) | 5993(4)  | 32(1)          |
| C(8)  | 5944(4) | 2746(5) | 3110(4)  | 31(1)          |
| C(9)  | 5761(4) | 7611(5) | 4617(4)  | 32(1)          |
| C(10) | 8021(4) | 8570(5) | 5341(4)  | 35(1)          |
| C(11) | 7102(5) | 9365(5) | 6861(4)  | 37(1)          |
| C(12) | 7707(4) | 3755(5) | 6579(3)  | 30(1)          |
| C(13) | 7038(4) | 3457(5) | 7336(4)  | 32(1)          |
| C(14) | 7467(4) | 2844(5) | 8238(4)  | 35(1)          |
| C(15) | 8532(4) | 2522(6) | 8401(4)  | 38(1)          |
| C(16) | 9190(4) | 2828(6) | 7637(4)  | 40(1)          |
| C(17) | 8790(4) | 3442(5) | 6689(4)  | 35(1)          |
| C(18) | 9530(4) | 3746(6) | 5873(4)  | 42(1)          |

|       |          |          |          |       |
|-------|----------|----------|----------|-------|
| C(19) | 9753(7)  | 5287(8)  | 5695(6)  | 65(2) |
| C(20) | 5428(4)  | 640(5)   | 2109(4)  | 35(1) |
| C(21) | 5059(4)  | 1903(6)  | 1697(4)  | 33(1) |
| C(22) | 4359(4)  | 2083(5)  | 718(4)   | 33(1) |
| C(23) | 4242(4)  | 980(6)   | -7(4)    | 37(1) |
| C(24) | 3620(5)  | 1149(6)  | -934(4)  | 39(1) |
| C(25) | 3099(4)  | 2437(6)  | -1127(4) | 37(1) |
| C(26) | 3182(4)  | 3553(6)  | -420(4)  | 38(1) |
| C(27) | 3811(4)  | 3370(5)  | 497(4)   | 36(1) |
| O(1S) | 10420(4) | 2641(6)  | 2032(3)  | 58(1) |
| C(1S) | 9155(7)  | 3930(9)  | 2854(5)  | 65(2) |
| C(2S) | 9343(5)  | 3219(7)  | 1845(5)  | 51(1) |
| C(3S) | 8540(7)  | 2032(10) | 1603(6)  | 75(2) |
| C(4S) | 9294(7)  | 4344(8)  | 991(5)   | 63(2) |
| C(5S) | 10816(8) | 1851(11) | 1221(6)  | 76(2) |

---

**Table S3.** Bond lengths [Å] and angles [°] for NIH33.

---

|              |          |              |          |
|--------------|----------|--------------|----------|
| Cl(1)-C(14)  | 1.762(5) | C(10)-H(10C) | 0.9800   |
| Cl(2)-C(25)  | 1.752(5) | C(11)-H(11A) | 0.9800   |
| S(1)-C(8)    | 1.744(5) | C(11)-H(11B) | 0.9800   |
| S(1)-C(20)   | 1.708(5) | C(11)-H(11C) | 0.9800   |
| O(1)-C(1)    | 1.220(6) | C(12)-C(13)  | 1.380(8) |
| O(2)-C(7)    | 1.469(6) | C(12)-C(17)  | 1.385(7) |
| O(2)-C(9)    | 1.338(6) | C(13)-H(13)  | 0.9500   |
| O(3)-C(9)    | 1.200(6) | C(13)-C(14)  | 1.370(7) |
| N(1)-C(1)    | 1.421(6) | C(14)-C(15)  | 1.368(8) |
| N(1)-C(5)    | 1.370(6) | C(15)-H(15)  | 0.9500   |
| N(1)-C(12)   | 1.458(6) | C(15)-C(16)  | 1.378(8) |
| N(2)-C(8)    | 1.294(6) | C(16)-H(16)  | 0.9500   |
| N(2)-C(21)   | 1.373(6) | C(16)-C(17)  | 1.410(7) |
| C(1)-C(2)    | 1.446(7) | C(17)-C(18)  | 1.499(8) |
| C(2)-C(3)    | 1.367(7) | C(18)-H(18A) | 0.9900   |
| C(2)-C(8)    | 1.467(7) | C(18)-H(18B) | 0.9900   |
| C(3)-H(3)    | 0.9500   | C(18)-C(19)  | 1.483(9) |
| C(3)-C(4)    | 1.408(7) | C(19)-H(19A) | 0.9800   |
| C(4)-C(5)    | 1.365(7) | C(19)-H(19B) | 0.9800   |
| C(4)-C(9)    | 1.487(6) | C(19)-H(19C) | 0.9800   |
| C(5)-C(6)    | 1.496(7) | C(20)-H(20)  | 0.9500   |
| C(6)-H(6A)   | 0.9900   | C(20)-C(21)  | 1.355(7) |
| C(6)-H(6B)   | 0.9900   | C(21)-C(22)  | 1.490(7) |
| C(6)-C(7)    | 1.529(6) | C(22)-C(23)  | 1.393(8) |
| C(7)-C(10)   | 1.514(8) | C(22)-C(27)  | 1.397(7) |
| C(7)-C(11)   | 1.514(7) | C(23)-H(23)  | 0.9500   |
| C(10)-H(10A) | 0.9800   | C(23)-C(24)  | 1.385(8) |
| C(10)-H(10B) | 0.9800   | C(24)-H(24)  | 0.9500   |

|                 |           |                  |          |
|-----------------|-----------|------------------|----------|
| C(24)-C(25)     | 1.376(8)  | O(1)-C(1)-C(2)   | 125.1(4) |
| C(25)-C(26)     | 1.385(7)  | N(1)-C(1)-C(2)   | 115.7(4) |
| C(26)-H(26)     | 0.9500    | C(1)-C(2)-C(8)   | 119.4(4) |
| C(26)-C(27)     | 1.380(7)  | C(3)-C(2)-C(1)   | 120.4(4) |
| C(27)-H(27)     | 0.9500    | C(3)-C(2)-C(8)   | 120.0(4) |
| O(1S)-C(2S)     | 1.454(8)  | C(2)-C(3)-H(3)   | 119.6    |
| O(1S)-C(5S)     | 1.414(9)  | C(2)-C(3)-C(4)   | 120.8(4) |
| C(1S)-H(1SA)    | 0.9800    | C(4)-C(3)-H(3)   | 119.6    |
| C(1S)-H(1SB)    | 0.9800    | C(3)-C(4)-C(9)   | 119.2(4) |
| C(1S)-H(1SC)    | 0.9800    | C(5)-C(4)-C(3)   | 120.5(4) |
| C(1S)-C(2S)     | 1.508(10) | C(5)-C(4)-C(9)   | 120.1(4) |
| C(2S)-C(3S)     | 1.508(10) | N(1)-C(5)-C(6)   | 120.5(4) |
| C(2S)-C(4S)     | 1.523(9)  | C(4)-C(5)-N(1)   | 119.5(4) |
| C(3S)-H(3SA)    | 0.9800    | C(4)-C(5)-C(6)   | 120.0(4) |
| C(3S)-H(3SB)    | 0.9800    | C(5)-C(6)-H(6A)  | 109.6    |
| C(3S)-H(3SC)    | 0.9800    | C(5)-C(6)-H(6B)  | 109.6    |
| C(4S)-H(4SA)    | 0.9800    | C(5)-C(6)-C(7)   | 110.4(4) |
| C(4S)-H(4SB)    | 0.9800    | H(6A)-C(6)-H(6B) | 108.1    |
| C(4S)-H(4SC)    | 0.9800    | C(7)-C(6)-H(6A)  | 109.6    |
| C(5S)-H(5SA)    | 0.9800    | C(7)-C(6)-H(6B)  | 109.6    |
| C(5S)-H(5SB)    | 0.9800    | O(2)-C(7)-C(6)   | 109.4(4) |
| C(5S)-H(5SC)    | 0.9800    | O(2)-C(7)-C(10)  | 108.0(4) |
|                 |           | O(2)-C(7)-C(11)  | 104.5(4) |
| C(20)-S(1)-C(8) | 88.5(2)   | C(10)-C(7)-C(6)  | 112.6(4) |
| C(9)-O(2)-C(7)  | 119.6(4)  | C(11)-C(7)-C(6)  | 111.3(4) |
| C(1)-N(1)-C(12) | 115.4(4)  | C(11)-C(7)-C(10) | 110.7(4) |
| C(5)-N(1)-C(1)  | 123.2(4)  | N(2)-C(8)-S(1)   | 114.4(4) |
| C(5)-N(1)-C(12) | 120.7(4)  | N(2)-C(8)-C(2)   | 123.7(4) |
| C(8)-N(2)-C(21) | 111.4(4)  | C(2)-C(8)-S(1)   | 121.6(3) |
| O(1)-C(1)-N(1)  | 119.3(4)  | O(2)-C(9)-C(4)   | 118.1(4) |



|                     |          |                     |          |
|---------------------|----------|---------------------|----------|
| O(3)-C(9)-O(2)      | 119.5(4) | C(12)-C(17)-C(18)   | 123.5(5) |
| O(3)-C(9)-C(4)      | 122.3(4) | C(16)-C(17)-C(18)   | 120.1(5) |
| C(7)-C(10)-H(10A)   | 109.5    | C(17)-C(18)-H(18A)  | 108.4    |
| C(7)-C(10)-H(10B)   | 109.5    | C(17)-C(18)-H(18B)  | 108.4    |
| C(7)-C(10)-H(10C)   | 109.5    | H(18A)-C(18)-H(18B) | 107.4    |
| H(10A)-C(10)-H(10B) | 109.5    | C(19)-C(18)-C(17)   | 115.6(5) |
| H(10A)-C(10)-H(10C) | 109.5    | C(19)-C(18)-H(18A)  | 108.4    |
| H(10B)-C(10)-H(10C) | 109.5    | C(19)-C(18)-H(18B)  | 108.4    |
| C(7)-C(11)-H(11A)   | 109.5    | C(18)-C(19)-H(19A)  | 109.5    |
| C(7)-C(11)-H(11B)   | 109.5    | C(18)-C(19)-H(19B)  | 109.5    |
| C(7)-C(11)-H(11C)   | 109.5    | C(18)-C(19)-H(19C)  | 109.5    |
| H(11A)-C(11)-H(11B) | 109.5    | H(19A)-C(19)-H(19B) | 109.5    |
| H(11A)-C(11)-H(11C) | 109.5    | H(19A)-C(19)-H(19C) | 109.5    |
| H(11B)-C(11)-H(11C) | 109.5    | H(19B)-C(19)-H(19C) | 109.5    |
| C(13)-C(12)-N(1)    | 116.4(4) | S(1)-C(20)-H(20)    | 124.4    |
| C(13)-C(12)-C(17)   | 122.6(4) | C(21)-C(20)-S(1)    | 111.2(4) |
| C(17)-C(12)-N(1)    | 120.8(4) | C(21)-C(20)-H(20)   | 124.4    |
| C(12)-C(13)-H(13)   | 120.7    | N(2)-C(21)-C(22)    | 119.3(4) |
| C(14)-C(13)-C(12)   | 118.6(5) | C(20)-C(21)-N(2)    | 114.5(4) |
| C(14)-C(13)-H(13)   | 120.7    | C(20)-C(21)-C(22)   | 126.1(5) |
| C(13)-C(14)-Cl(1)   | 118.3(4) | C(23)-C(22)-C(21)   | 121.0(5) |
| C(15)-C(14)-Cl(1)   | 119.8(4) | C(23)-C(22)-C(27)   | 118.1(5) |
| C(15)-C(14)-C(13)   | 121.8(5) | C(27)-C(22)-C(21)   | 120.9(4) |
| C(14)-C(15)-H(15)   | 120.5    | C(22)-C(23)-H(23)   | 119.2    |
| C(14)-C(15)-C(16)   | 118.9(5) | C(24)-C(23)-C(22)   | 121.5(5) |
| C(16)-C(15)-H(15)   | 120.5    | C(24)-C(23)-H(23)   | 119.2    |
| C(15)-C(16)-H(16)   | 119.1    | C(23)-C(24)-H(24)   | 120.7    |
| C(15)-C(16)-C(17)   | 121.8(5) | C(25)-C(24)-C(23)   | 118.6(5) |
| C(17)-C(16)-H(16)   | 119.1    | C(25)-C(24)-H(24)   | 120.7    |
| C(12)-C(17)-C(16)   | 116.3(5) | C(24)-C(25)-Cl(2)   | 119.2(4) |

|                     |          |                     |       |
|---------------------|----------|---------------------|-------|
| C(24)-C(25)-C(26)   | 121.7(5) | H(4SA)-C(4S)-H(4SB) | 109.5 |
| C(26)-C(25)-Cl(2)   | 119.1(4) | H(4SA)-C(4S)-H(4SC) | 109.5 |
| C(25)-C(26)-H(26)   | 120.5    | H(4SB)-C(4S)-H(4SC) | 109.5 |
| C(27)-C(26)-C(25)   | 119.0(5) | O(1S)-C(5S)-H(5SA)  | 109.5 |
| C(27)-C(26)-H(26)   | 120.5    | O(1S)-C(5S)-H(5SB)  | 109.5 |
| C(22)-C(27)-H(27)   | 119.5    | O(1S)-C(5S)-H(5SC)  | 109.5 |
| C(26)-C(27)-C(22)   | 121.1(5) | H(5SA)-C(5S)-H(5SB) | 109.5 |
| C(26)-C(27)-H(27)   | 119.5    | H(5SA)-C(5S)-H(5SC) | 109.5 |
| C(5S)-O(1S)-C(2S)   | 116.8(5) | H(5SB)-C(5S)-H(5SC) | 109.5 |
| H(1SA)-C(1S)-H(1SB) | 109.5    |                     |       |
| H(1SA)-C(1S)-H(1SC) | 109.5    |                     |       |
| H(1SB)-C(1S)-H(1SC) | 109.5    |                     |       |
| C(2S)-C(1S)-H(1SA)  | 109.5    |                     |       |
| C(2S)-C(1S)-H(1SB)  | 109.5    |                     |       |
| C(2S)-C(1S)-H(1SC)  | 109.5    |                     |       |
| O(1S)-C(2S)-C(1S)   | 103.4(5) |                     |       |
| O(1S)-C(2S)-C(3S)   | 110.9(6) |                     |       |
| O(1S)-C(2S)-C(4S)   | 110.6(6) |                     |       |
| C(1S)-C(2S)-C(3S)   | 110.4(7) |                     |       |
| C(1S)-C(2S)-C(4S)   | 109.6(6) |                     |       |
| C(3S)-C(2S)-C(4S)   | 111.7(5) |                     |       |
| C(2S)-C(3S)-H(3SA)  | 109.5    |                     |       |
| C(2S)-C(3S)-H(3SB)  | 109.5    |                     |       |
| C(2S)-C(3S)-H(3SC)  | 109.5    |                     |       |
| H(3SA)-C(3S)-H(3SB) | 109.5    |                     |       |
| H(3SA)-C(3S)-H(3SC) | 109.5    |                     |       |
| H(3SB)-C(3S)-H(3SC) | 109.5    |                     |       |
| C(2S)-C(4S)-H(4SA)  | 109.5    |                     |       |
| C(2S)-C(4S)-H(4SB)  | 109.5    |                     |       |
| C(2S)-C(4S)-H(4SC)  | 109.5    |                     |       |

---

**Table S4.** Anisotropic displacement parameters ( $\text{\AA}^2 \times 10^3$ ) for NIH33. The anisotropic displacement factor exponent takes the form:  $-2\pi^2 [ h^2 a^{*2} U^{11} + \dots + 2 h k a^* b^* U^{12} ]$

|       | $U^{11}$ | $U^{22}$ | $U^{33}$ | $U^{23}$ | $U^{13}$ | $U^{12}$ |
|-------|----------|----------|----------|----------|----------|----------|
| Cl(1) | 56(1)    | 40(1)    | 33(1)    | 6(1)     | 5(1)     | -2(1)    |
| Cl(2) | 55(1)    | 49(1)    | 34(1)    | 0(1)     | -12(1)   | -3(1)    |
| S(1)  | 50(1)    | 24(1)    | 32(1)    | 1(1)     | -6(1)    | 1(1)     |
| O(1)  | 51(2)    | 26(2)    | 38(2)    | -1(1)    | -10(2)   | 6(2)     |
| O(2)  | 37(2)    | 25(2)    | 33(2)    | -2(1)    | -3(1)    | 3(1)     |
| O(3)  | 47(2)    | 30(2)    | 44(2)    | 2(1)     | -16(2)   | 6(2)     |
| N(1)  | 36(2)    | 25(2)    | 26(2)    | 2(2)     | -1(2)    | 1(2)     |
| N(2)  | 41(2)    | 26(2)    | 28(2)    | 1(2)     | 0(2)     | 0(2)     |
| C(1)  | 39(2)    | 24(2)    | 30(2)    | -1(2)    | 0(2)     | -1(2)    |
| C(2)  | 36(2)    | 29(2)    | 29(2)    | 3(2)     | 2(2)     | -3(2)    |
| C(3)  | 35(2)    | 29(2)    | 26(2)    | 5(2)     | -2(2)    | -2(2)    |
| C(4)  | 33(2)    | 24(2)    | 31(2)    | 3(2)     | -1(2)    | -2(2)    |
| C(5)  | 32(2)    | 25(2)    | 30(2)    | 1(2)     | 4(2)     | -2(2)    |
| C(6)  | 38(2)    | 29(2)    | 24(2)    | 1(2)     | 0(2)     | 0(2)     |
| C(7)  | 36(2)    | 27(2)    | 32(2)    | 0(2)     | -4(2)    | -1(2)    |
| C(8)  | 38(2)    | 26(2)    | 30(2)    | 1(2)     | 2(2)     | 2(2)     |
| C(9)  | 35(2)    | 26(2)    | 33(2)    | 2(2)     | -1(2)    | -1(2)    |
| C(10) | 40(3)    | 28(2)    | 36(2)    | -1(2)    | -4(2)    | -1(2)    |
| C(11) | 46(3)    | 28(2)    | 35(3)    | 0(2)     | -4(2)    | 0(2)     |
| C(12) | 40(3)    | 22(2)    | 25(2)    | -1(2)    | -5(2)    | 2(2)     |
| C(13) | 36(2)    | 28(2)    | 31(2)    | -3(2)    | -7(2)    | -3(2)    |
| C(14) | 47(3)    | 26(2)    | 30(2)    | 0(2)     | 1(2)     | -1(2)    |
| C(15) | 48(3)    | 34(2)    | 30(2)    | 1(2)     | -9(2)    | 4(2)     |
| C(16) | 39(3)    | 38(3)    | 40(3)    | 0(2)     | -6(2)    | 7(2)     |

|       |       |       |       |       |        |        |
|-------|-------|-------|-------|-------|--------|--------|
| C(17) | 40(3) | 30(2) | 34(2) | -2(2) | -1(2)  | 1(2)   |
| C(18) | 39(3) | 44(3) | 42(3) | -3(2) | 1(2)   | 6(2)   |
| C(19) | 72(5) | 45(3) | 85(5) | -6(3) | 42(4)  | -1(3)  |
| C(20) | 45(3) | 28(3) | 33(2) | -2(2) | 1(2)   | 0(2)   |
| C(21) | 37(3) | 29(2) | 34(2) | -4(2) | 4(2)   | -2(2)  |
| C(22) | 37(2) | 31(2) | 31(2) | 2(2)  | 3(2)   | -4(2)  |
| C(23) | 45(3) | 31(2) | 34(2) | 0(2)  | 1(2)   | -1(2)  |
| C(24) | 47(3) | 34(3) | 35(2) | -6(2) | 0(2)   | -5(2)  |
| C(25) | 39(3) | 39(3) | 31(2) | -2(2) | -3(2)  | -4(2)  |
| C(26) | 48(3) | 31(2) | 35(3) | 2(2)  | 0(2)   | 3(2)   |
| C(27) | 46(3) | 28(2) | 32(2) | -1(2) | 3(2)   | -2(2)  |
| O(1S) | 61(2) | 70(3) | 39(2) | -8(2) | -4(2)  | 5(2)   |
| C(1S) | 73(5) | 77(5) | 42(3) | 5(3)  | -2(3)  | 19(4)  |
| C(2S) | 54(3) | 56(4) | 42(3) | 4(3)  | -4(3)  | -4(3)  |
| C(3S) | 84(5) | 82(5) | 55(4) | 13(4) | -16(4) | -28(4) |
| C(4S) | 85(5) | 55(4) | 47(3) | 1(3)  | -7(3)  | -6(3)  |
| C(5S) | 93(6) | 87(5) | 47(4) | -9(4) | 6(4)   | 12(5)  |

---

**Table S5.** Hydrogen coordinates ( $\times 10^4$ ) and isotropic displacement parameters ( $\text{\AA}^2 \times 10^{-3}$ ) for NIH33.

|        | x     | y     | z     | U(eq) |
|--------|-------|-------|-------|-------|
| H(3)   | 5512  | 5478  | 3273  | 36    |
| H(6A)  | 7817  | 6510  | 6751  | 37    |
| H(6B)  | 6571  | 6652  | 6916  | 37    |
| H(10A) | 7994  | 7880  | 4771  | 52    |
| H(10B) | 8701  | 8466  | 5767  | 52    |
| H(10C) | 7961  | 9549  | 5064  | 52    |
| H(11A) | 7047  | 10338 | 6573  | 55    |
| H(11B) | 7767  | 9277  | 7313  | 55    |
| H(11C) | 6490  | 9181  | 7260  | 55    |
| H(13)  | 6295  | 3671  | 7235  | 39    |
| H(15)  | 8815  | 2095  | 9031  | 46    |
| H(16)  | 9932  | 2621  | 7752  | 48    |
| H(18A) | 10218 | 3252  | 6065  | 51    |
| H(18B) | 9218  | 3322  | 5216  | 51    |
| H(19A) | 10357 | 5372  | 5270  | 98    |
| H(19B) | 9932  | 5767  | 6358  | 98    |
| H(19C) | 9119  | 5741  | 5338  | 98    |
| H(20)  | 5289  | -274  | 1800  | 42    |
| H(23)  | 4598  | 91    | 137   | 44    |
| H(24)  | 3554  | 392   | -1426 | 47    |
| H(26)  | 2812  | 4431  | -563  | 46    |
| H(27)  | 3873  | 4131  | 985   | 43    |
| H(1SA) | 9153  | 3199  | 3395  | 97    |

|        |       |      |      |     |
|--------|-------|------|------|-----|
| H(1SB) | 8464  | 4427 | 2784 | 97  |
| H(1SC) | 9727  | 4626 | 3037 | 97  |
| H(3SA) | 8703  | 1537 | 971  | 112 |
| H(3SB) | 7819  | 2442 | 1505 | 112 |
| H(3SC) | 8578  | 1345 | 2176 | 112 |
| H(4SA) | 9786  | 5133 | 1197 | 95  |
| H(4SB) | 8563  | 4718 | 873  | 95  |
| H(4SC) | 9503  | 3904 | 356  | 95  |
| H(5SA) | 11561 | 1575 | 1416 | 113 |
| H(5SB) | 10781 | 2445 | 597  | 113 |
| H(5SC) | 10382 | 984  | 1086 | 113 |

---
